# Supplementary material
Source: PubMed Central journal article supplement (PMC3635459)
Supplement: supp_126.5.1081_JCS115592.pdf [file supp_126.5.1081_JCS115592.pdf]

Fig.S1

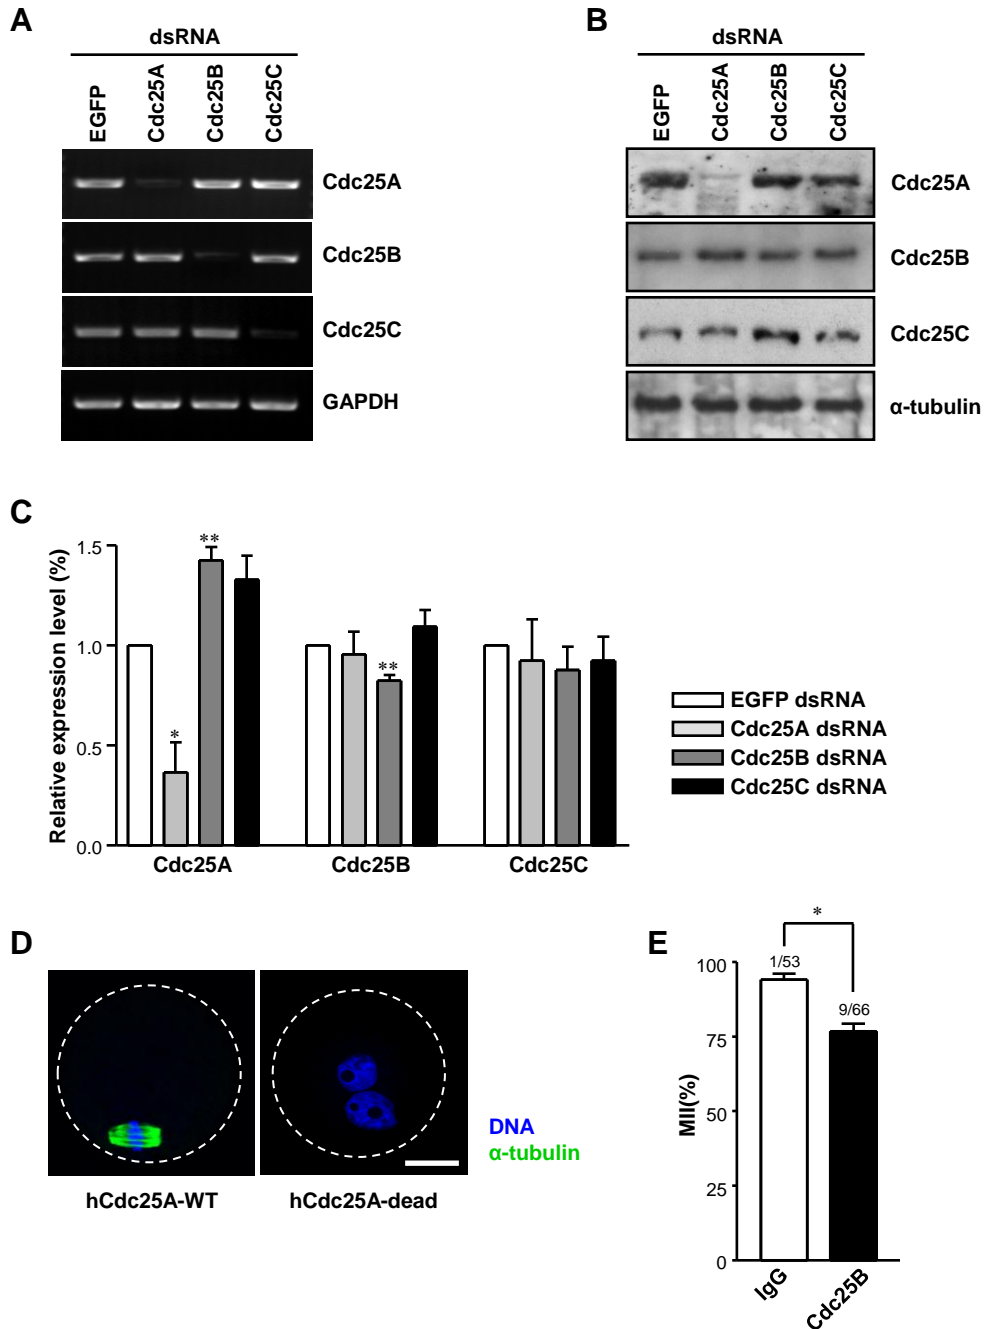

**Fig S1. Knockdown of Cdc25 phosphatases.** RT-PCR (A) and immunoblotting (B) of Cdc25s knockdown oocytes. (C) Protein levels were quantified and normalized to controls. (D) Rescue of Cdc25A knockdown by overexpressing human Cdc25A wild-type (WT), but not by overexpressing catalytically inactive (dead) human Cdc25A. Spindle and DNA were stained with  $\alpha$ -tubulin and DAPI, respectively. Bar, 20 $\mu$ m. (E) Effect of Cdc25B antibody injection. MII oocytes were injected with antibodies against Cdc25B, and MII oocytes were counted after 8 hours. Normal IgG was used as a negative control. Data are the mean  $\pm$  SEM from at least three independent experiments. Numbers above the bars indicate the number of oocytes in the MII stage and number of total oocytes. \* $p$ <0.05 and \*\* $p$ <0.005.

**Fig.S2**

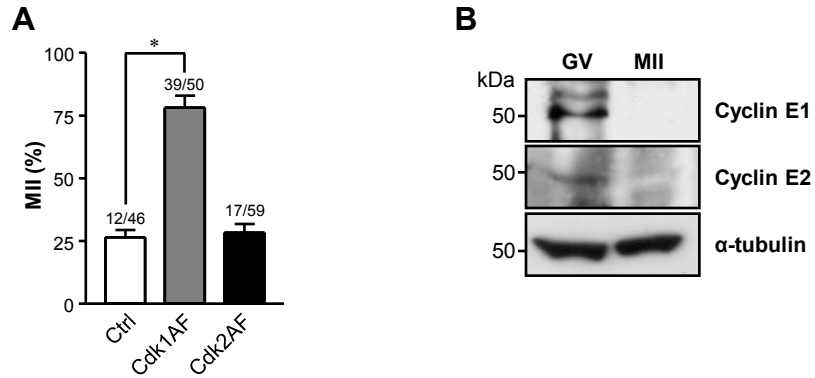

**Fig S2. Cdk2-cyclin E is dispensable for MII arrest in mouse oocytes.** (A) MII oocytes overexpressing Cdk1AF or Cdk2AF mutant were activated with strontium for 8 hours. Non-injected MII oocytes were used as a control (Ctrl). Numbers above the bars indicate the number of oocytes in the MII stage and number of total oocytes. (B) Immunoblotting of cyclin E in mouse oocytes. GV and MII oocytes were immunoblotted for cyclin E1 and E2. Each lane contains 250 oocytes. \* $p < 0.001$ .

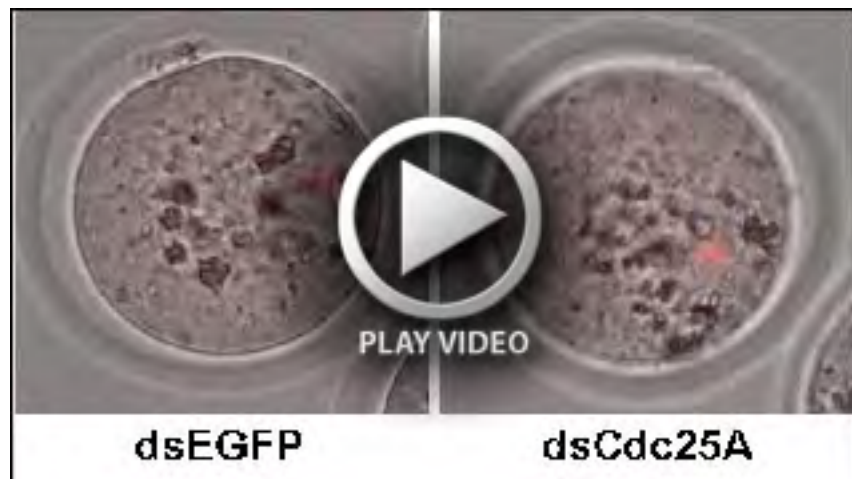

**Movie 1. Knockdown of Cdc25A in mouse oocytes.** MII oocytes coinjected with H2B-mCherry mRNA and dsRNAs corresponding to EGFP or Cdc25A were incubated for 2 hours to allow expression of fluorescent proteins and then examined by time-lapse microscopy. Frames were taken every 10 minute for 12 hours. The video is shown at 7 frames/s.

**Table S1. Primer sequences used in this study**

| rPurpose             | Target gene | Sequence (5' to 3')                         |                                             |
|----------------------|-------------|---------------------------------------------|---------------------------------------------|
|                      |             | Forward                                     | Reverse                                     |
| Preparation of dsRNA | Cdc25A      | ATTAATACGACTCACTATAGGGAGAAGCTGCTGGCGGACTGTC | ATTAATACGACTCACTATAGGGAGACAAACAGCCCGCAACGAT |
|                      | Cdc25B      | ATTAATACGACTCACTATAGGGAGAGATGGAAGTAGAGGAGC  | ATTAATACGACTCACTATAGGGAGACTGGTCTTGCAGCCTGC  |
|                      | Cdc25C      | ATTAATACGACTCACTATAGGGAGACCAGACTCGGCAAACC   | ATTAATACGACTCACTATAGGGAGACAGCCACTGTGTCTGGGC |
|                      | EGFP        | ATTAATACGACTAACTATAGGGAGAATGGTGAGCAAGGGCGAG | ATTAATACGACTCACTATAGGGAGAGCTCGTCCATGCCGAGAG |
| RT-PCR               | Cdc25A      | GTCTCAGGAGGAGCCTCC                          | CATGTGCAGATTCACGGC                          |
|                      | Cdc25B      | GATGGAAGTAGAGGAGC                           | CTTCCAGGGGTGTCACAC                          |
|                      | Cdc25C      | GAATGGGAGGCACCTAGG                          | GCACCGTTGGCAGCACAC                          |
|                      | GAPDH       | ACCACAGTCCATGCCATCAC                        | TCCACCACCTGTTGCTGTA                         |
